# Supplementary material for: Association of Post–COVID-19 Condition Symptoms and Employment Status
Source: PubMed Central journal article supplement (PMC9932847; doi:10.1001/jamanetworkopen.2022.56152), 2023-02-15
Supplement: jamanetwopen-e2256152-s001.pdf [file jamanetwopen-e2256152-s001.pdf]

## **Data Sharing Statement**

Perlis. Association of Post-COVID-19 Condition Symptoms and Employment Status. *JAMA Netw Open*. Published February 15, 2023. doi:10.1001/jamanetworkopen.2022.56152

### **Data**

**Data available:** No
